# Supplementary material
Source: PubMed Central journal article supplement (PMC7066656)
Supplement: ao9b04322_si_001.pdf [file ao9b04322_si_001.pdf]

Supporting Information for:

An Indonesian marine bacterium, *Pseudoalteromonas rubra*, produces antimicrobial prodiginine pigments

*Edi Setiyono, Marcelinus Alfasisurya Setya Adhiwibawa, Renny Indrawati, Monika Nur Utami Prihastyanti, Yuzo Shioi, and Tatas Hardo Panintingjati Brotosudarmo \**

Ma Chung Research Center for Photosynthetic Pigments (MRCPP) and Department of Chemistry, Universitas Ma Chung, Villa Puncak Tidar N01, Malang 65151, Jawa Timur, Indonesia

Supporting materials and figures

- 1) **Table S1:** *P. rubra* strains that have been deposited in NCBI
- 2) **Figure S1:** The distribution map from 45 strains of *P. rubra* that have been found until now
- 3) **Figure S2:** The number of isolated *P. rubra* found from different sources
- 4) **Figure S3:** The plot of  $\log k'$  value of 2-methyl-3-propyl-prodiginine ( $k' = -0.605$ ), 2-methyl-3-butyl-prodiginine ( $k' = -0.339$ ), prodigiosin ( $k' = -0.048$ ), 2-methyl-3-hexyl-prodiginine ( $k' = 0.099$ ), and 2-methyl-3-heptyl-prodiginine ( $k' = 0.249$ ) versus number of the carbon atoms of the alkyl side chains of the pigment molecule showed a linear line with  $R^2 = 0.9755$
- 5) **Figure S4:** The comparison mass spectra of standard prodigiosin hydrochloride and purified pigment peak #4 from *P. rubra* strain PS1
- 6) **Figure S5:** ESI-MS/MS analysis of the purified compounds
- 7) **Table S2:** Prodigiosin-producing marine bacteria

1) Table S1

| No | <i>P. rubra</i> Strain | Accession Number | Sampling Location                   | No | <i>P. rubra</i> Strain | Accession Number | Sampling Location                    |
|----|------------------------|------------------|-------------------------------------|----|------------------------|------------------|--------------------------------------|
| 1  | ATCC 29570             | NR026223         | Mediterranean Sea near Nice         | 24 | OCN096                 | NZLFZX01000000   | Kaneohe Bay, Hawaii, USA             |
| 2  | PS1                    | LC476556         | Sika Island, Alor, Indonesia        | 25 | AN34                   | JQ409378         | Havelock Island, Andaman Sea         |
| 3  | SB14                   | LC487904         | Sebanjar Beach, Alor, Indonesia     | 26 | B1M                    | HQ439549         | Hawaii, Oahu, Kaneohe Bay, USA       |
| 4  | SW1                    | LC435074         | Kondang Merak Coast, Malang         | 27 | PC13b                  | HQ439548         | Hawaii, Oahu, Kaneohe Bay, USA       |
| 5  | SCSIO 6842             | CP013611         | Bay of Bengal, Indian Ocean         | 28 | G31a                   | HQ439547         | Hawaii, Oahu, Kaneohe Bay, USA       |
| 6  | 1020R                  | AB373122         | Cape Muroto coast, Kochi, Japan     | 29 | PC13d                  | HQ439541         | Hawaii, Oahu, Kaneohe Bay, USA       |
| 7  | W3                     | NZRHHZ01000000   | Lamma Island, Hongkong              | 30 | PC13c                  | HQ439540         | Hawaii, Oahu, Kaneohe Bay, USA       |
| 8  | T7                     | NZRHHY01000000   | Lamma Island, Hongkong              | 31 | BRA007                 | HQ840708         | Taiba Beach, Brazile                 |
| 9  | W5                     | NZRHIA01000000   | Lamma Island, Hongkong              | 32 | KJN19_02               | LC328972         | Karimun Jawa Island, Indonesia       |
| 10 | Wn5                    | LT604915         | Arabian Sea, West Coast             | 33 | Bu15_31                | KY671183         | North Sulawesi, Indonesia            |
| 11 | B32                    | LC325178         | Mediterranean Sea                   | 34 | SDP12                  | MK672867         | Japan                                |
| 12 | IGB9                   | MF356667         | Igang, Guimaras, Philippines        | 35 | W240                   | GU826580         | Grand Bahama Island, Bahamas         |
| 13 | MS01                   | MF179501         | Mexico: Sonora                      | 36 | F75064                 | JF281761         | Kavaratti Island, Lakshadweep, India |
| 14 | YA-13M-2               | KY366346         | Micronesia                          | 37 | N8AM91                 | KF193911         | Korea                                |
| 15 | GC3                    | LC435077         | Kondang Merak Coast, Malang         | 38 | L-21                   | HG315019         | Goa, Dona Paula Bay, India           |
| 16 | BF1A IBRL              | KP330490         | Malaysia                            | 39 | S2722                  | FJ457192         | Ghozo Island                         |
| 17 | S4059                  | FJ457237         | Pacific Ocean                       | 40 | S2599                  | FJ457186         | Solomon Sea                          |
| 18 | S2678                  | FJ457189         | New Georgia Island                  | 41 | S2472                  | FJ457185         | Coral Sea                            |
| 19 | S2676                  | FJ457188         | New Georgia Island                  | 42 | S2471                  | FJ457184         | Coral Sea                            |
| 20 | TKA09_02               | LC275063         | Karimun Jawa Island, Indonesia      | 43 | S1946                  | FJ457169         | Indian Ocean near west Australia     |
| 21 | UMTBB216               | MG896160         | Bidong Island, Terengganu, Malaysia | 44 | S1944                  | FJ457168         | Indian Ocean near west Australia     |
| 22 | UMTBB120               | MG896142         | Bidong Island, Terengganu, Malaysia | 45 | S1943                  | FJ457167         | Indian Ocean near west Australia     |
| 23 | TKJD22                 | LC385643         | Karimun Jawa Island, Indonesia      |    |                        |                  |                                      |

**Table S1.** *P. rubra* strains that have been deposited in National Center for Biotechnology Information (NCBI) <sup>61</sup>

## 2) Figure S1

According to data in **Table 1**. The distribution map of *P. rubra* was created using QGIS version 2.18.19 and the ESRI continent base map. As shown as in **Figure S1** below, *P. rubra* has been discovered throughout the region spanning the Indian Pacific to Atlantic Oceans. However, most strains have been found in the Indo-Pacific area.

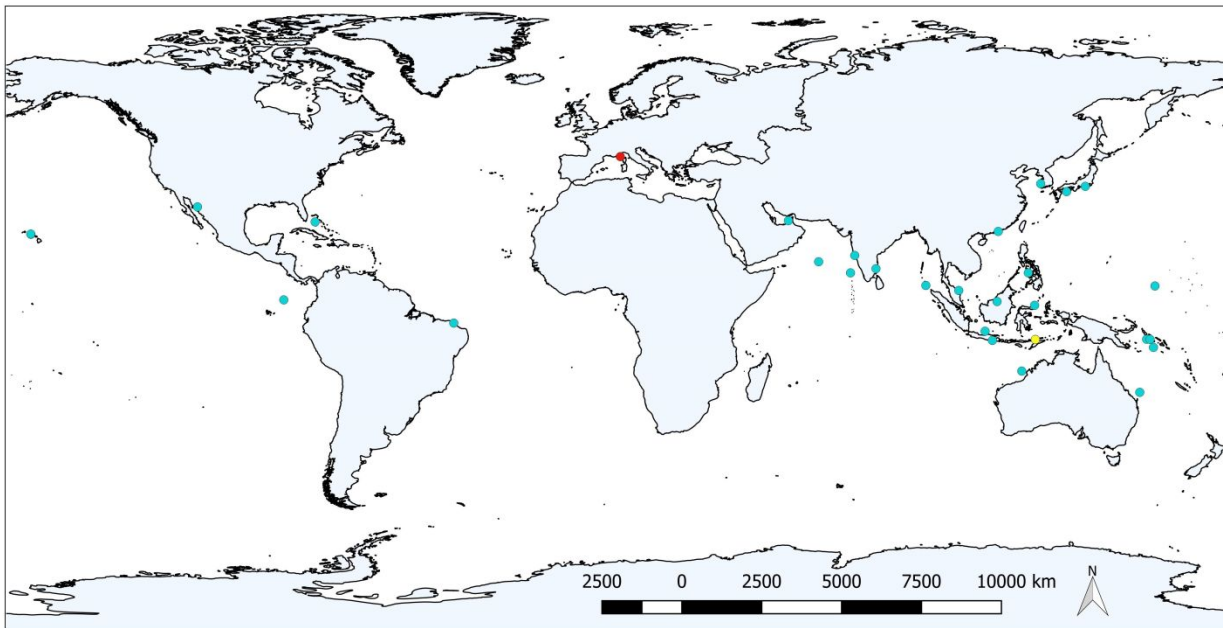

**Figure S1.** The distribution map from 45 strains of *P. rubra* that have been found until now. Red spot is the first location where *P. rubra* was found. Yellow spot is the sampling location in this study. Whilst blue spots are other locations for the isolated *P. rubra*. The data was obtained from NCBI <sup>61</sup>

### 3) Figure S2

Based on our literature study in National Center for Biotechnology Information we found that the known 45 strains of *P. rubra* were isolated from various habitats. The graphic is shown in **Figure S2** below.

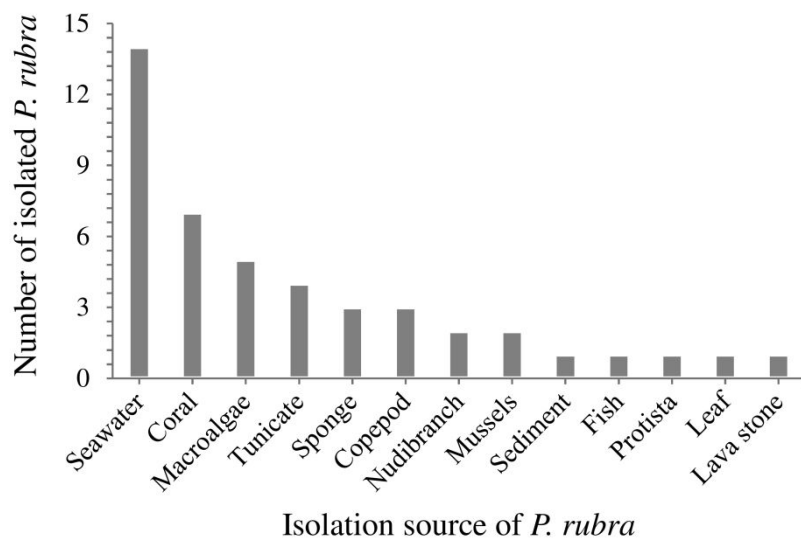

**Figure S2.** The number of isolated *P. rubra* found from different sources. The data were obtained from NCBI <sup>61</sup>

#### 4) Figure S3

The identification of prodigiosin and four derivatives was confirmed by the linear relationship between the log capacity factor ( $k'$ ) of the pigments and the number of the carbon atoms in the alkyl side chain of the pigment molecule. The capacity factor ( $k'$ ) was measured by  $k' = (t_R - t_0)/t_0$ , where  $t_R$  and  $t_0$  are the retention times of the retained and unretained solute in the given system, respectively. 1. 2-methyl-3-propyl-prodiginine (C of the alkyl side chains = 3); 2. 2-methyl-3-butyl-prodiginine (C = 4); 3. prodigiosin (C = 5); 4. 2-methyl-3-hexyl-prodiginine (C = 6); 5. 2-methyl-3-heptyl-prodiginine (C = 7)

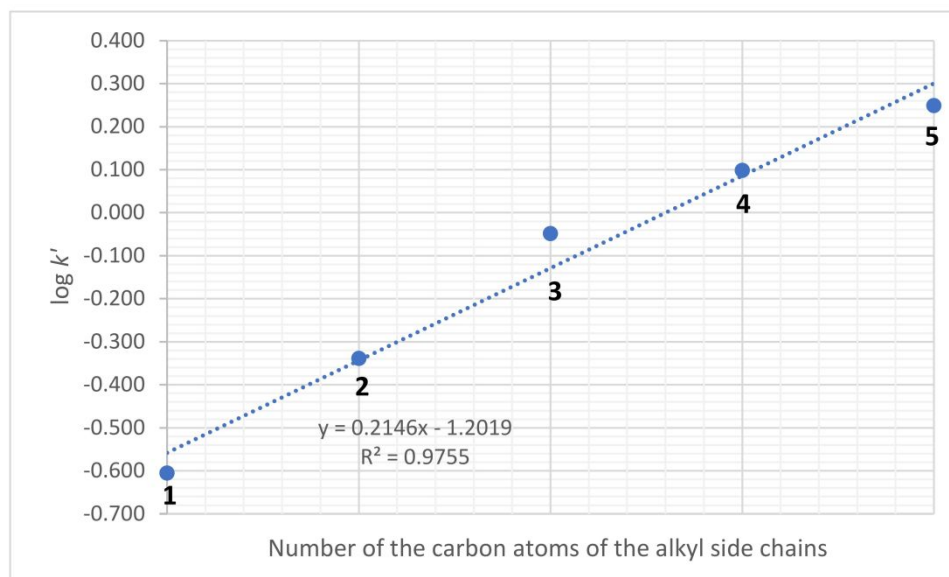

**Figure S3.** The plot of  $\log k'$  value of 2-methyl-3-propyl-prodiginine ( $k' = -0.605$ ), 2-methyl-3-butyl-prodiginine ( $k' = -0.339$ ), prodigiosin ( $k' = -0.048$ ), 2-methyl-3-hexyl-prodiginine ( $k' = 0.099$ ), and 2-methyl-3-heptyl-prodiginine ( $k' = 0.249$ )

versus number of the carbon atoms of the alkyl side chains of the pigment molecule showed a linear line with  $R^2 = 0.9755$

5) **Figure S4**

A prodigiosin standard was purchased from Sigma-Aldrich, MERCK. Determination of the pigments was based on their MS data and spectral properties. The simple MS method was used with isocratic HPLC elution by 0.1% formic acid in a mixture of methanol (90%) and water (10%) for 2 min at a flow rate of 0.3 mL/min without a column. The others parameter same in section Experimental Section: MS/MS Analysis. The precursor ions were fragmented in product ion scan mode by using CE -35, -20, and -10.

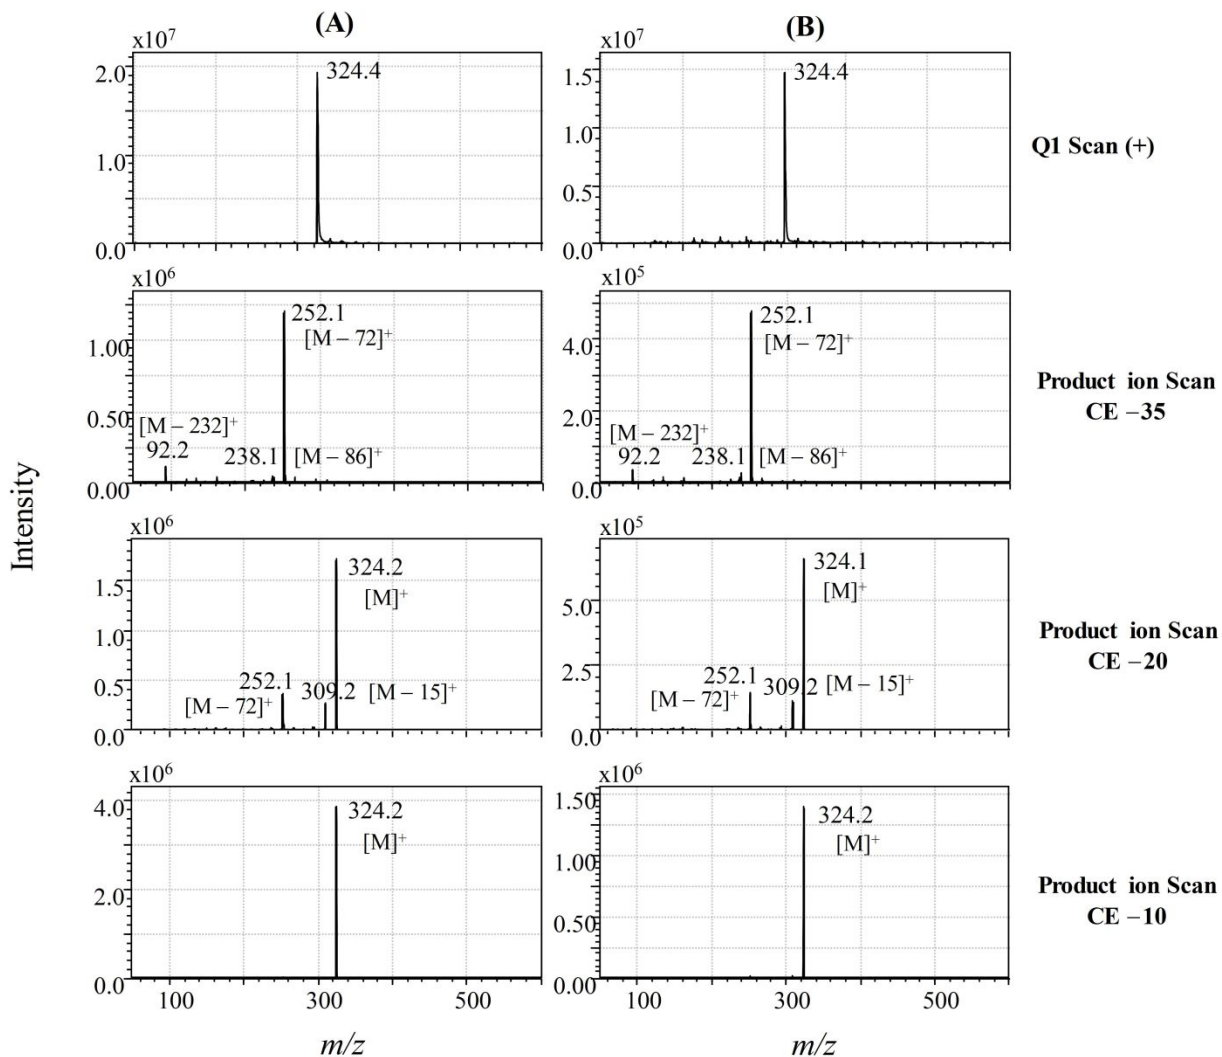

**Figure S4.** The comparison mass spectra of standard prodigiosin hydrochloride (A) and purified pigment peak #4 from *P. rubra* strain PS1 (B). Their same Q1 (+) and product ion scan (+) indicates that peak #4 in chromatogram HPLC is prodigiosin

#### 6) Figure S5

Two minor compound peak #1 and #2 were determined using MS/MS according to method same with prodigiosin. Peak #1 was identified as 2-methyl-3-propyl-prodiginine and #2 as 2-methyl-3-butyl-prodiginine.



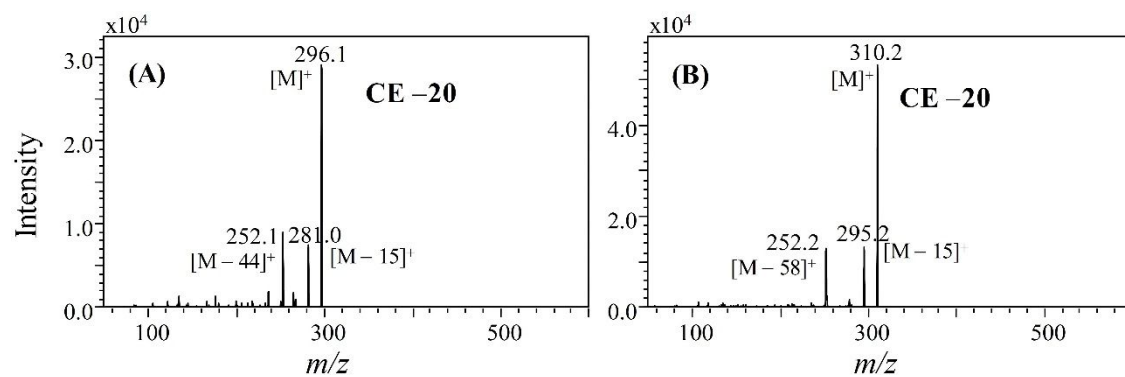

**Figure S5.** ESI-MS/MS analysis of the purified compounds. Product ion scan MS spectra of 2-methyl-3-propyl-prodiginine **(A)**, and 2-methyl-3-butyl-prodiginine **(B)**

### 7) Table S2

| Bacteria strains                  | Isolation sources | Location found            | Compounds |   |   |   |   |   |   |   |   |   |   |   |   | Ref. |               |
|-----------------------------------|-------------------|---------------------------|-----------|---|---|---|---|---|---|---|---|---|---|---|---|------|---------------|
|                                   |                   |                           | A         | B | C | D | E | F | G | H | I | J | K | L | M |      |               |
| <i>P. rubra</i> strain PS1        | Seawater          | Alor Island, Indonesia    | -         | - | + | + | + | + | + | + | + | - | - | - | - | -    | Present study |
| <i>P. rubra</i> ATCC 29570        | Seawater          | Mediterranean Sea, France | -         | - | + | - | - | + | - | - | - | - | - | - | - | -    | 21,25         |
| <i>P. denitrificans</i>           | Seawater          | Japan Sea, Japan          | -         | - | + | - | - | - | - | - | - | - | - | - | - | -    | 47            |
| <i>P. bacteriolytica japonica</i> | <i>Laminaria</i>  | Japan                     | -         | - | - | - | - | + | - | - | - | - | - | - | - | -    | 23            |
| <i>P. sp.</i> 1020R               | Seawater          | Cape Muroto, Japan        | -         | - | - | - | + | + | + | + | - | - | - | - | - | -    | 26            |
| <i>Zooshikella rubidus</i> S1-1   | Sediment          | Yellow Sea, Korea         | -         | - | + | - | + | + | + | + | + | + | - | - | - | -    | 33            |

|                                                        |                             |                              |   |   |   |   |   |   |   |   |   |   |   |   |   |       |
|--------------------------------------------------------|-----------------------------|------------------------------|---|---|---|---|---|---|---|---|---|---|---|---|---|-------|
| <i>Zooshikella marina</i>                              | Beach<br>sand               | Kachigad<br>Beach, India     | - | - | + | - | - | + | - | - | - | - | - | - | - | 50    |
| <i>Zooshikella<br/>ganghwensis</i>                     | Sediment                    | Ganghwa<br>Island, Korea     | - | - | - | - | - | + | - | - | - | - | - | - | - | 51    |
| <i>Hahella chejuensis</i>                              | Sediment                    | Cheju Island,<br>Korea       | - | - | - | - | + | + | + | + | - | - | - | - | - | 48,58 |
| <i>Hahella</i> sp. strain MS-<br>02-063                | Sediment                    | Omura Bay,<br>Japan          | - | - | - | - | - | + | - | - | - | - | - | - | - | 49    |
| <i>Vibrio psychroerythrus</i>                          | Flounder<br>eggs            | Trondheim,<br>Norway         | - | - | - | - | - | + | - | - | - | - | - | - | - | 40,59 |
| <i>Vibrio ruber</i>                                    | Seawater                    | Keelung,<br>Taiwan           | - | - | - | - | - | + | - | - | - | - | - | - | - | 41    |
| <i>Vibrio</i> sp. DSM 14379                            | Seawater                    | Northern<br>Adriatic Sea     | - | - | - | - | - | + | - | - | - | - | - | - | - | 42    |
| <i>Beneckea gazogenes</i>                              | Saltwater<br>marsh          | Woods Hole,<br>United States | - | - | - | - | - | + | - | - | - | - | - | - | - | 38    |
| <i>Pseudomonas<br/>magnesorubra</i>                    | <i>Caulerpa<br/>peltata</i> | Bombay,<br>India             | - | - | - | - | - | + | + | + | - | - | - | - | - | 46    |
| <i>Pseudovibrio<br/>denitrificans</i> strain<br>Z143-1 | Tunicate                    | Zamboanga,<br>Philippines    | - | - | - | - | - | - | - | + | - | - | - | - | - | 39    |
| <i>Streptomyces</i> sp. SCSIO<br>11594                 | Sediment                    | South China<br>Sea           | + | + | - | - | - | - | - | - | - | - | - | - | - | 43    |
| <i>Streptomyces<br/>griseoviridis</i>                  | Soil                        | Texas, United<br>States      | - | - | - | - | - | - | - | - | - | - | + | + | - | 44,60 |

*Streptomyces coelicolor* Soil Not informed + - - - - - - - - - - + 5,45

A3(2)

---

**Table S2.** Prodigiosin-producing marine bacteria. Compound: A, undecylprodigiosin; B, metacycloprodigiosin; C, cycloprodigiosin; D, 2-methyl-3-propyl prodiginine; E, 2-methyl-3-butyl prodiginine; F, prodigiosin; G, 2-methyl-3-hexyl prodiginine; H, 2-methyl-3-heptyl prodiginine; I, 2-methyl-3-octyl prodiginine; J, 2-methyl-3-nonyl prodiginine; K, prodigiosin R1; L, prodigiosin R2; M, butyl-metacycloheptylprodiginine. +, detected and -, not detected
